# Supplementary material for: Interleukin-11 signaling promotes cellular reprogramming and limits fibrotic scarring during tissue regeneration
Source: PubMed Central journal article supplement (PMC8442930; doi:10.1126/sciadv.abg6497), 2021-09-08
Supplement: sciadv.abg6497_sm.pdf [file sciadv.abg6497_sm.pdf]

Supplementary Materials for

**Interleukin-11 signaling promotes cellular reprogramming and limits fibrotic scarring during tissue regeneration**

Srinivas Allanki, Boris Strilic, Lilly Scheinberger, Yeszamin L. Onderwater, Alora Marks, Stefan Günther, Jens Preussner, Khrievono Kikhi, Mario Looso, Didier Y. R. Stainier, Sven Reischauer\*

\*Corresponding author. Email: [s.reischauer@kerckhoff-fgi.de](mailto:s.reischauer@kerckhoff-fgi.de)

Published 8 September 2021, *Sci. Adv.* 7, eabg6497 (2021)  
DOI: 10.1126/sciadv.abg6497

**The PDF file includes:**

Figs. S1 to S13  
Legends for tables S1 to S6

**Other Supplementary Material for this manuscript includes the following:**

Tables S1 to S6

**A**

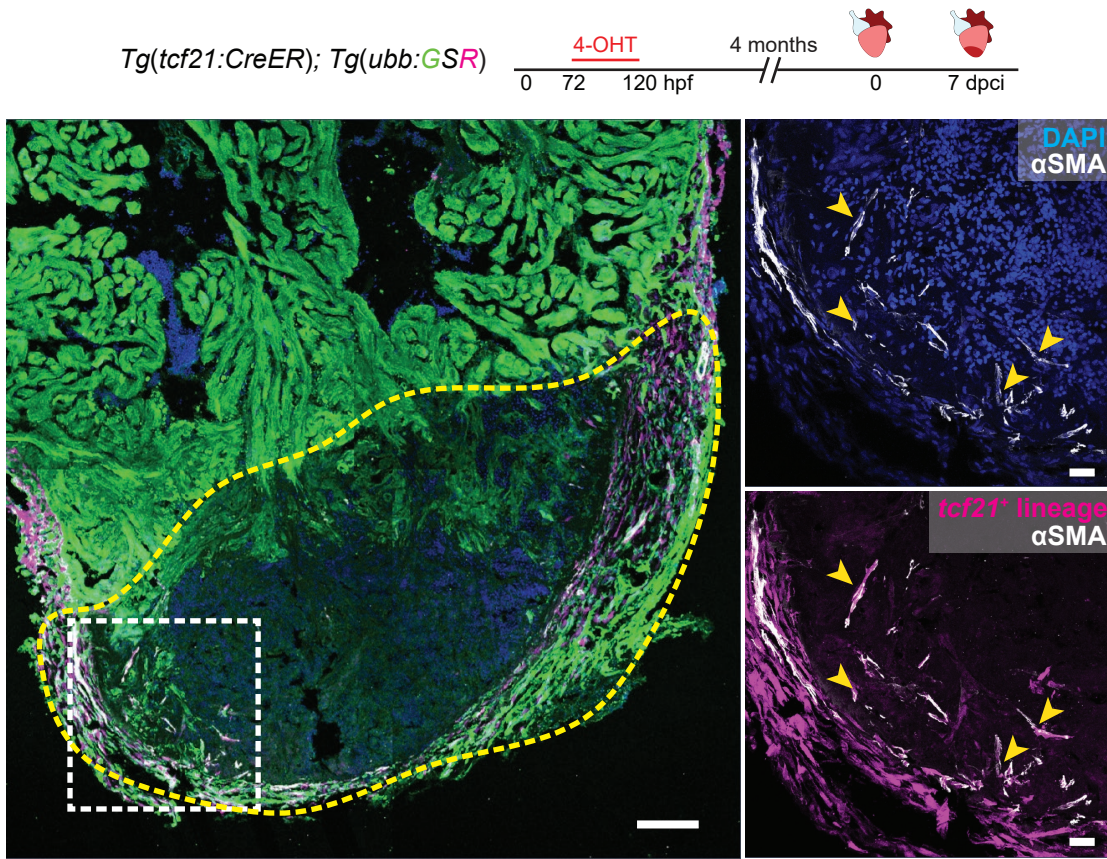

**B**

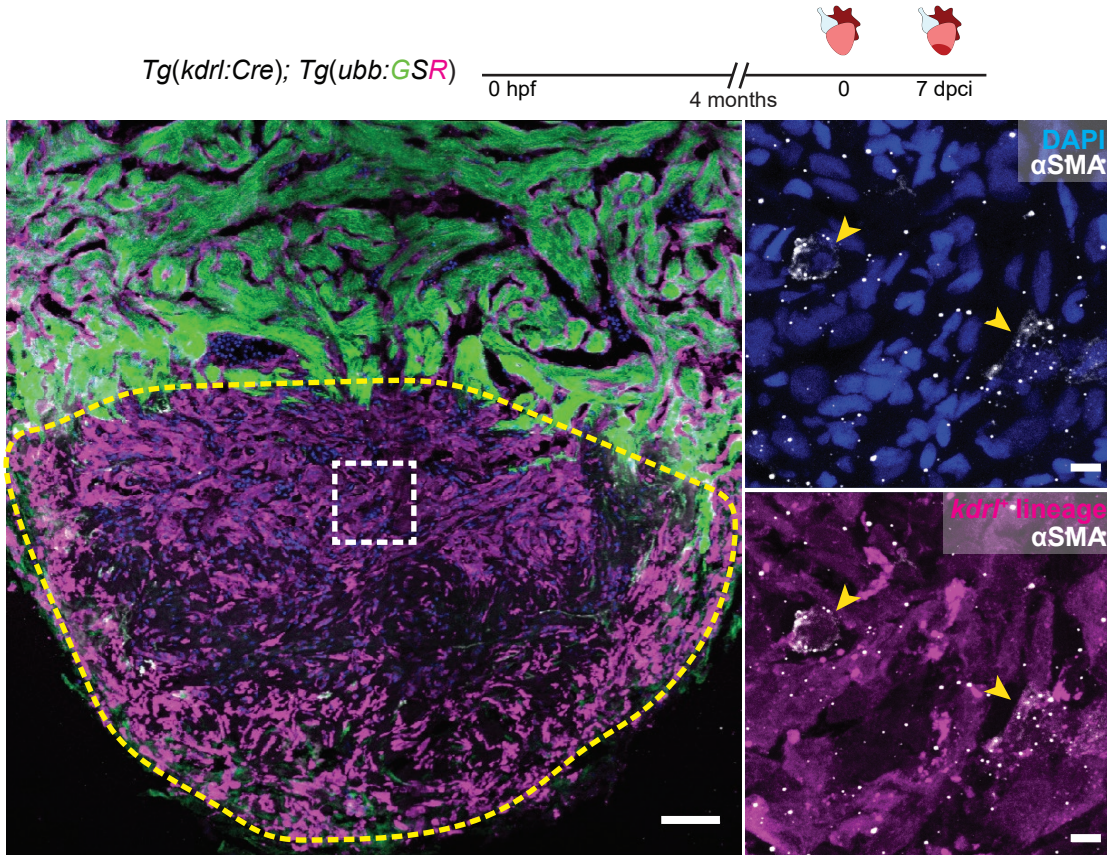

**Figure S1. Analysis of myofibroblast origin during zebrafish cardiac regeneration.**

(A) Experimental design and immunostaining (GFP - green,  $\alpha$ SMA – white, and mCherry – magenta; n=4; 7 dpci) on cryosections from *Tg(tcf21:CreER); Tg(ubb:GSR)* ventricles. (B) Experimental design and immunostaining (GFP - green,  $\alpha$ SMA – white, and mCherry – magenta; n=4; 7 dpci) on cryosections from *Tg(kdrl:Cre); Tg(ubb:GSR)* ventricles. n= ventricles (A, B). Yellow dashed lines demarcate the injured area (A, B); arrowheads point to  $\alpha$ SMA<sup>+</sup> cells derived from *tcf21*<sup>+</sup> lineage (A insets) and *kdrl*<sup>+</sup> lineage (B insets). Scale bars, 100  $\mu$ m (A), 50  $\mu$ m (B), 10  $\mu$ m (A insets), 5  $\mu$ m (B insets).

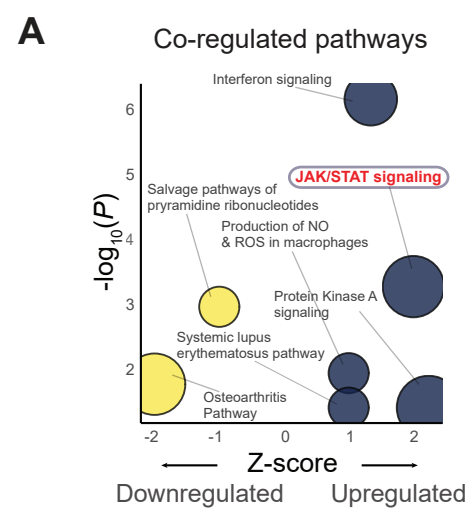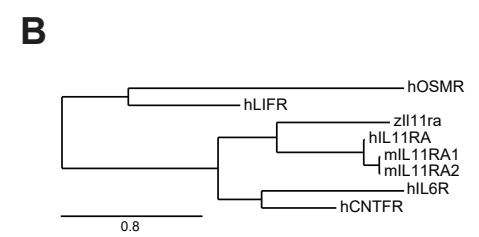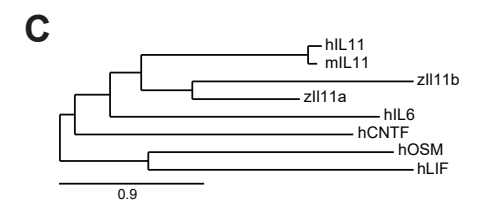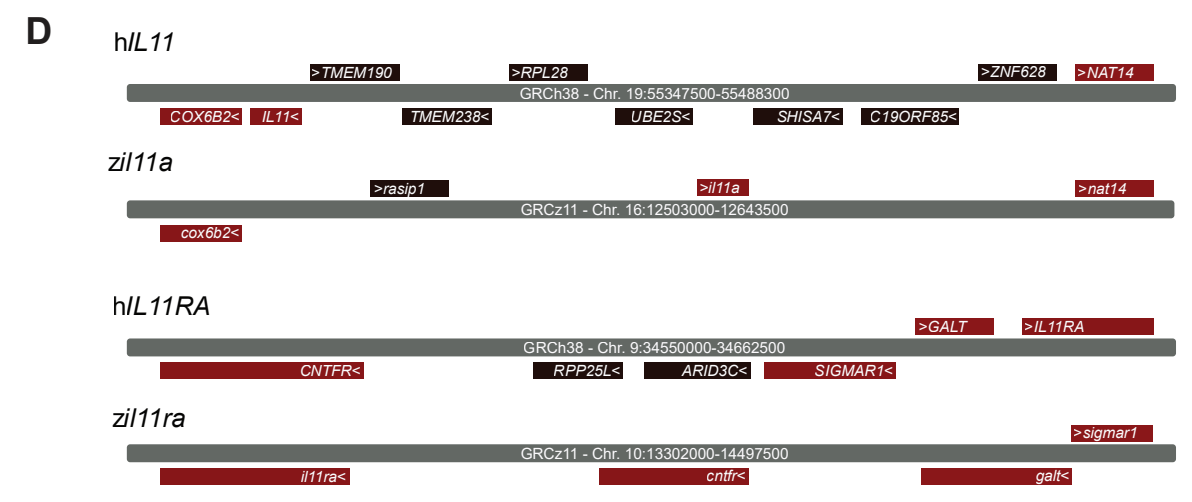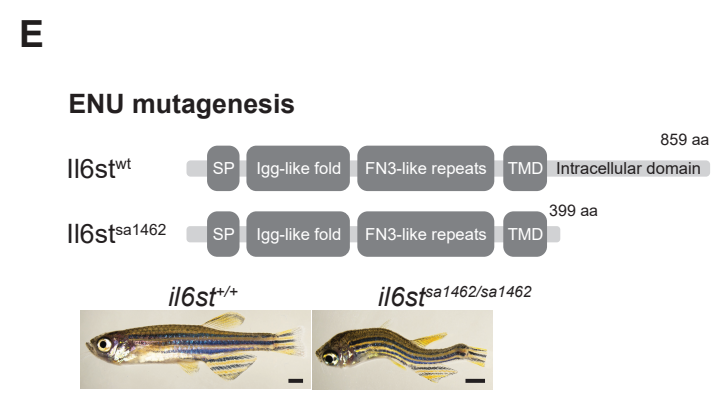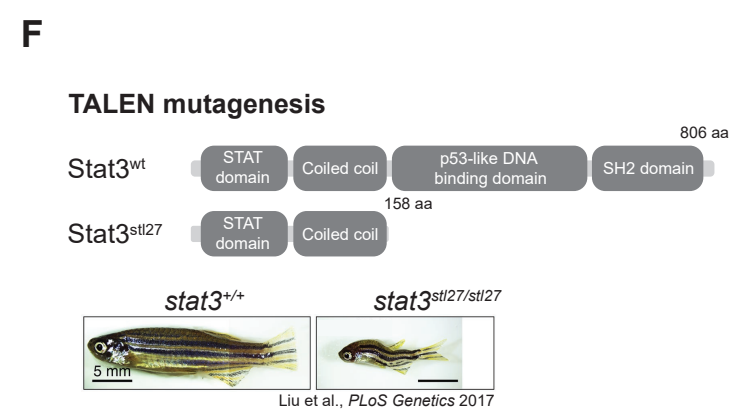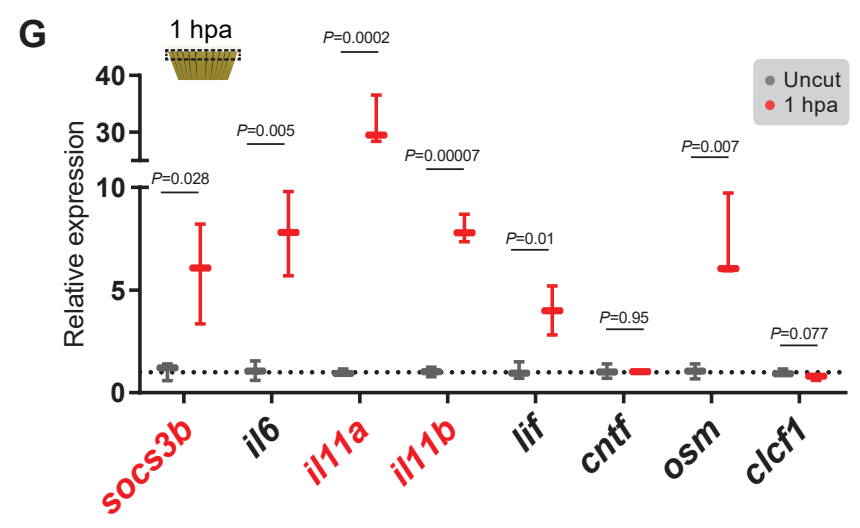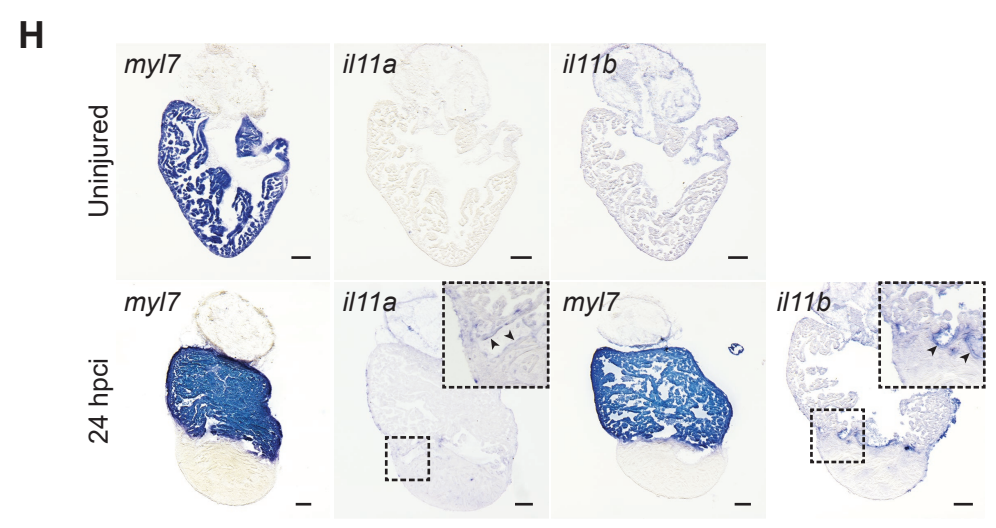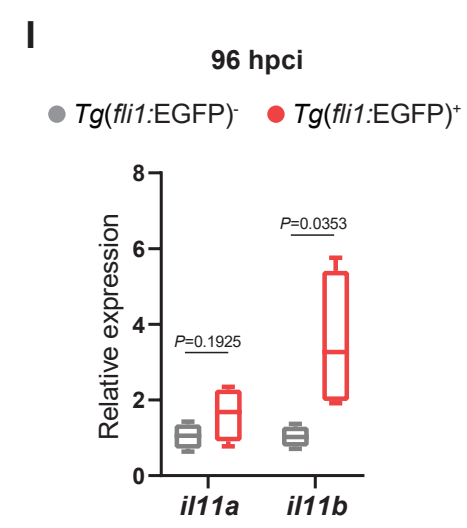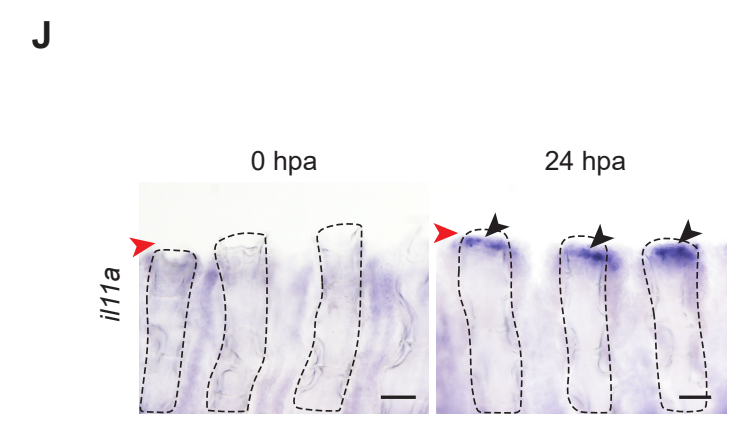

**Figure S2. Il-11/Il6st/Stat3 pathway is activated post-injury.**

(A) Results from pathway analysis using Ingenuity pathway analysis (IPA). (B and C) Phylogenetic analysis of human, mouse, and zebrafish Il-11 cytokine receptor (B) and ligands (C). (D) Synteny analysis for human and zebrafish genes encoding Il-11 ligands and receptors; gene sizes are not to scale. (E and F) Illustration of wild-type and the predicted mutant proteins, gross morphology of adult zebrafish mutants (E, *il6st<sup>sal1462</sup>*; F, *stat3<sup>stl27</sup>*) and their respective wild-type siblings. (G) RT-qPCR analysis of Il-6 family cytokine mRNA levels (1 hpa, n=3; uncut, n=3) on adult caudal fins. (H) Brightfield images of RNA *in situ* hybridization for *myl7*, *ill1a*, *ill1b* on 11  $\mu$ m thick cryosections from uninjured and 24 hpci wild-type ventricles. (I) RT-qPCR analysis on sorted *Tg(fli1:EGFP)<sup>+</sup>* vs. *Tg(fli1:EGFP)<sup>-</sup>* cardiac ventricular cells (96 hpci, n=4 each). (J) Brightfield images of RNA *in situ* hybridization for *ill1a* on wholemount adult caudal fins, 24 hpa. SP: signal peptide (E); TMD: transmembrane domain (E). Box plots (G, I) show median, interquartile range (IQR, box margins) and 5<sup>th</sup> and 95<sup>th</sup> percentiles (whiskers). Student's *t*-tests (G, I). n= pools of 2 caudal fins (G); n= pools of two ventricles (I). Black arrowheads point to border zone endothelial gene expression (H) and blastemal expression (J); red arrowheads point to the amputation plane (J); black dashed lines outline the fin rays (J). Ct values are listed in table S5. Photo Credit: Adult zebrafish gross morphology images in F were obtained from Liu et al. (22). The photos were published under a CC-BY license ([hyperlink](#)). Scale bars, 1 mm (E), 5 mm (F), 200  $\mu$ m (H), 100  $\mu$ m (J).

**A****CRISPR-Cas9 mutagenesis**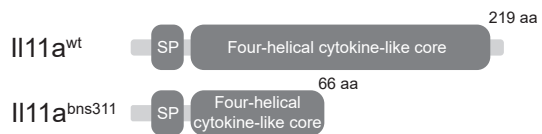**B**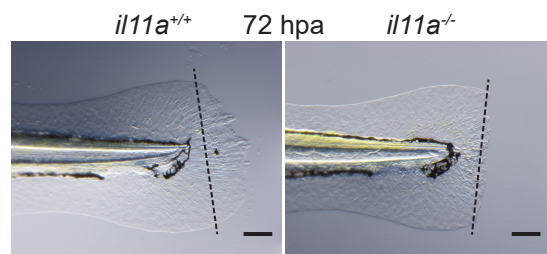**C**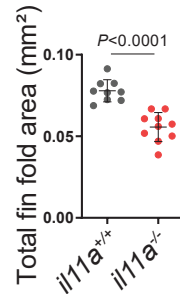**D****CRISPR-Cas9 mutagenesis**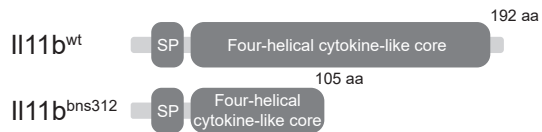**E**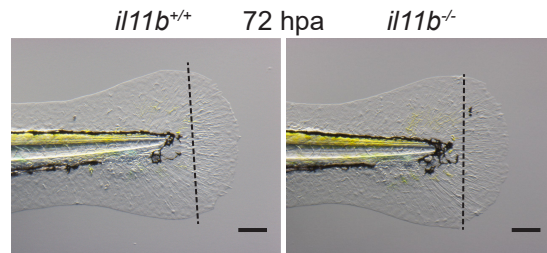**F**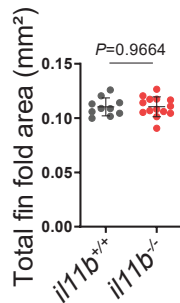

**Figure S3. Il-11a signaling is essential for larval fin fold regeneration.**

(A to F) Illustration of wild-type and the predicted mutant proteins (A, Il11a<sup>bns311</sup>; D, Il11b<sup>bns312</sup>), brightfield images of larval fin fold regeneration (amputated at 48-72 hpf), and their corresponding quantification of the fin fold area at 72 hpa (B and C, *il11a*<sup>bns311</sup>, wt siblings, n=9; mut, n=10; E and F, *il11b*<sup>bns312</sup>, wt siblings, n=10; mut, n=14). SP: signal peptide (A, D). Data represent mean  $\pm$  S.D. (C, F). Student's *t*-tests (C, F). n= larvae (C, F). Black dashed lines demarcate the amputation plane (B, E). Scale bars, 100  $\mu$ m (B, E).

A

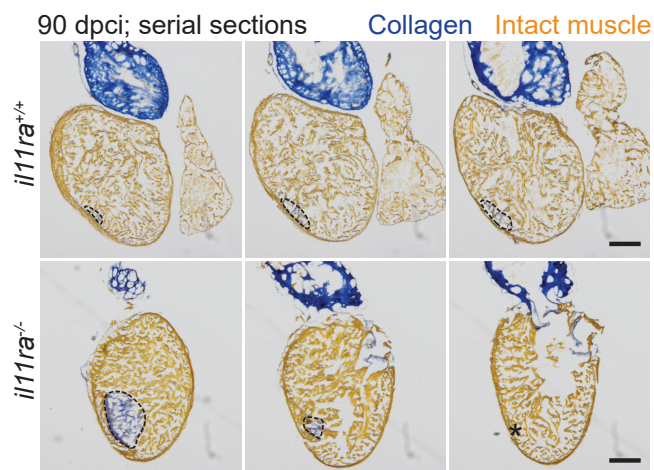

B

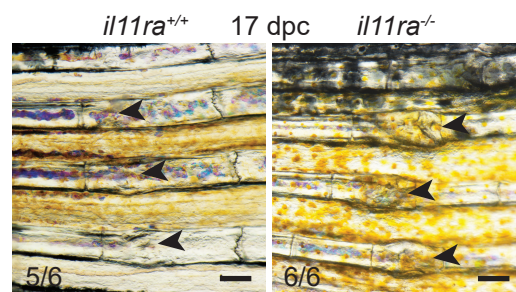

C

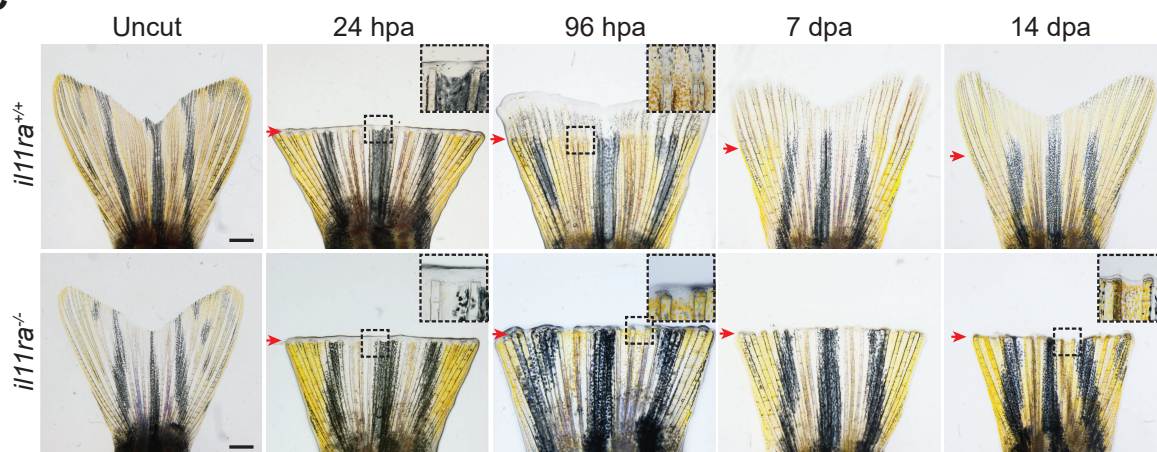

D

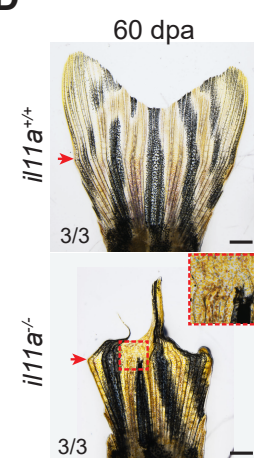

E

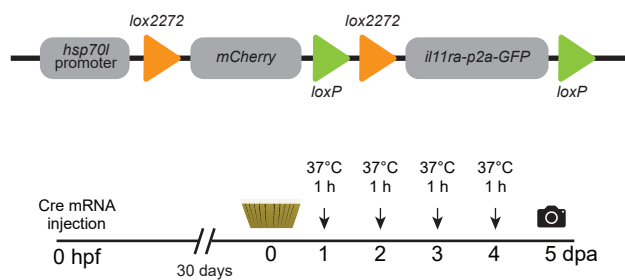

F

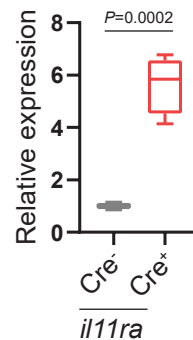

G

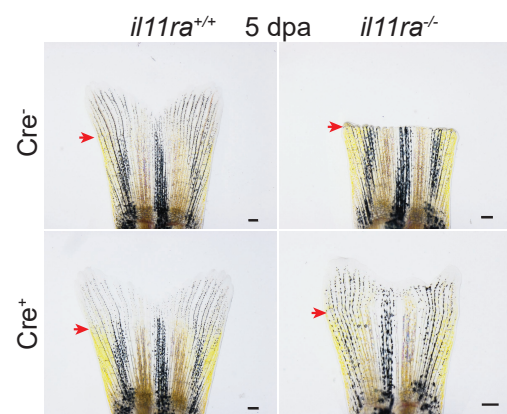

*Tg(hsp70l:loxp-lox2272-mCherry-loxp-il11ra-V5-p2a-GFP-lox2272)*



**Figure S4. Il-11 signaling is essential for adult heart and fin generation.**

(A) AFOG staining on serial cryosections from *ill1ra*<sup>-/-</sup> vs. wild-type sibling ventricles, 90 dpci, corresponding to Fig. 2H. (B) Wholemout images of bone crush injury in *ill1ra*<sup>-/-</sup> (n= 6) vs. wild-type (n= 6) caudal fins at 17 days post crush (dpc). (C) Wholemout images of time course of caudal fin regeneration in *ill1ra*<sup>-/-</sup> vs. wild-type siblings. (D) Wholemout images of caudal fin regeneration in *ill1ra*<sup>-/-</sup> (n=3) vs. wild-type siblings (n=3), 60 dpa. (E) Illustration of *ill1ra* re-expression construct and experimental set-up. (F) RT-qPCR analysis to test the induction of *ill1ra* expression in caudal fins of *Tg(hsp70l:loxp-lox2272-mCherry-loxp-ill1ra-V5-p2a-GFP-lox2272)* zebrafish (n=4 each; Cre mRNA injected vs. uninjected), 5 dpa. (G) Wholemout images of fin regeneration at 5 dpa in *Tg(hsp70l:loxp-lox2272-mCherry-loxp-ill1ra-V5-p2a-GFP-lox2272)* zebrafish in *ill1ra*<sup>-/-</sup> vs. wild-type backgrounds, and with or without Cre mRNA injection at the one-cell stage. Box plot (F) shows median, interquartile range (IQR, box margins) and 5<sup>th</sup> and 95<sup>th</sup> percentiles (whiskers). Student's *t*-test (F). n= adult caudal fins (B, D, F). Black dashed lines and asterisk demarcate the injured area (A); black arrowheads point to crushed regions in the adult caudal fins (B); red arrows point to the amputation plane (C, D, G). Ct values are listed in table S5. Scale bars, 200 μm (A, G), 100 μm (B), 1 mm (C, D).

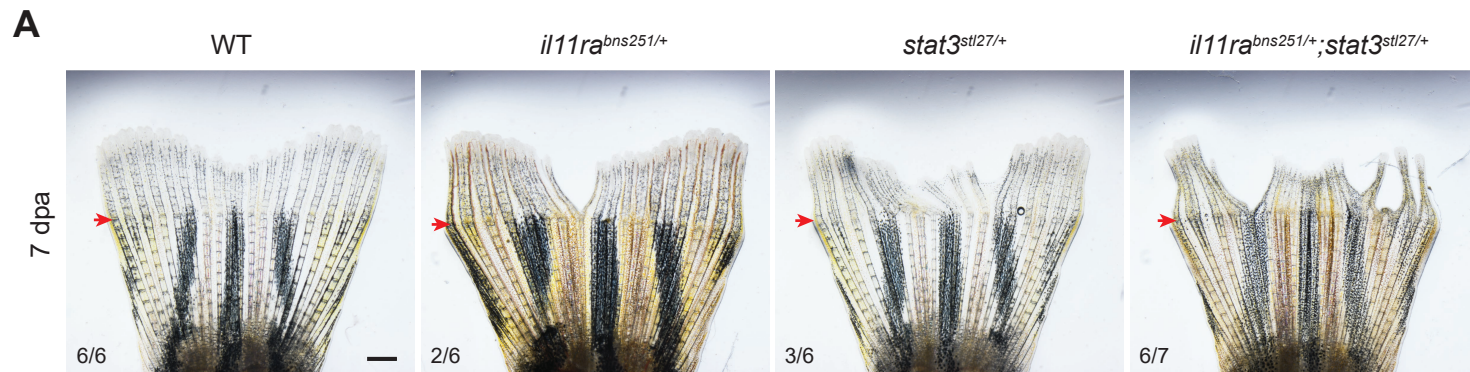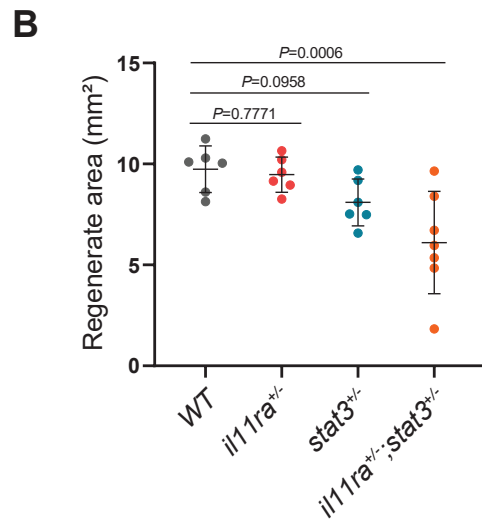

**Figure S5. Adult caudal fin regeneration in *ill1ra*<sup>bns251/+</sup>;*stat3*<sup>stl27/+</sup>.**

(A and B) Wholemout images of caudal fin regeneration in *ill1ra*<sup>+/-</sup> (n=6), *stat3*<sup>+/-</sup> (n=6), *ill1ra*<sup>+/-</sup>;*stat3*<sup>+/-</sup> (n=7) vs. wild-type siblings (n=6) (A) and quantification of the regenerate area, 7 dpa (B). n= caudal fins (A). Data represent mean ± S.D. (B). One-way ANOVA (B). Red arrows point to the amputation plane (A). Scale bar: 1 mm (A).

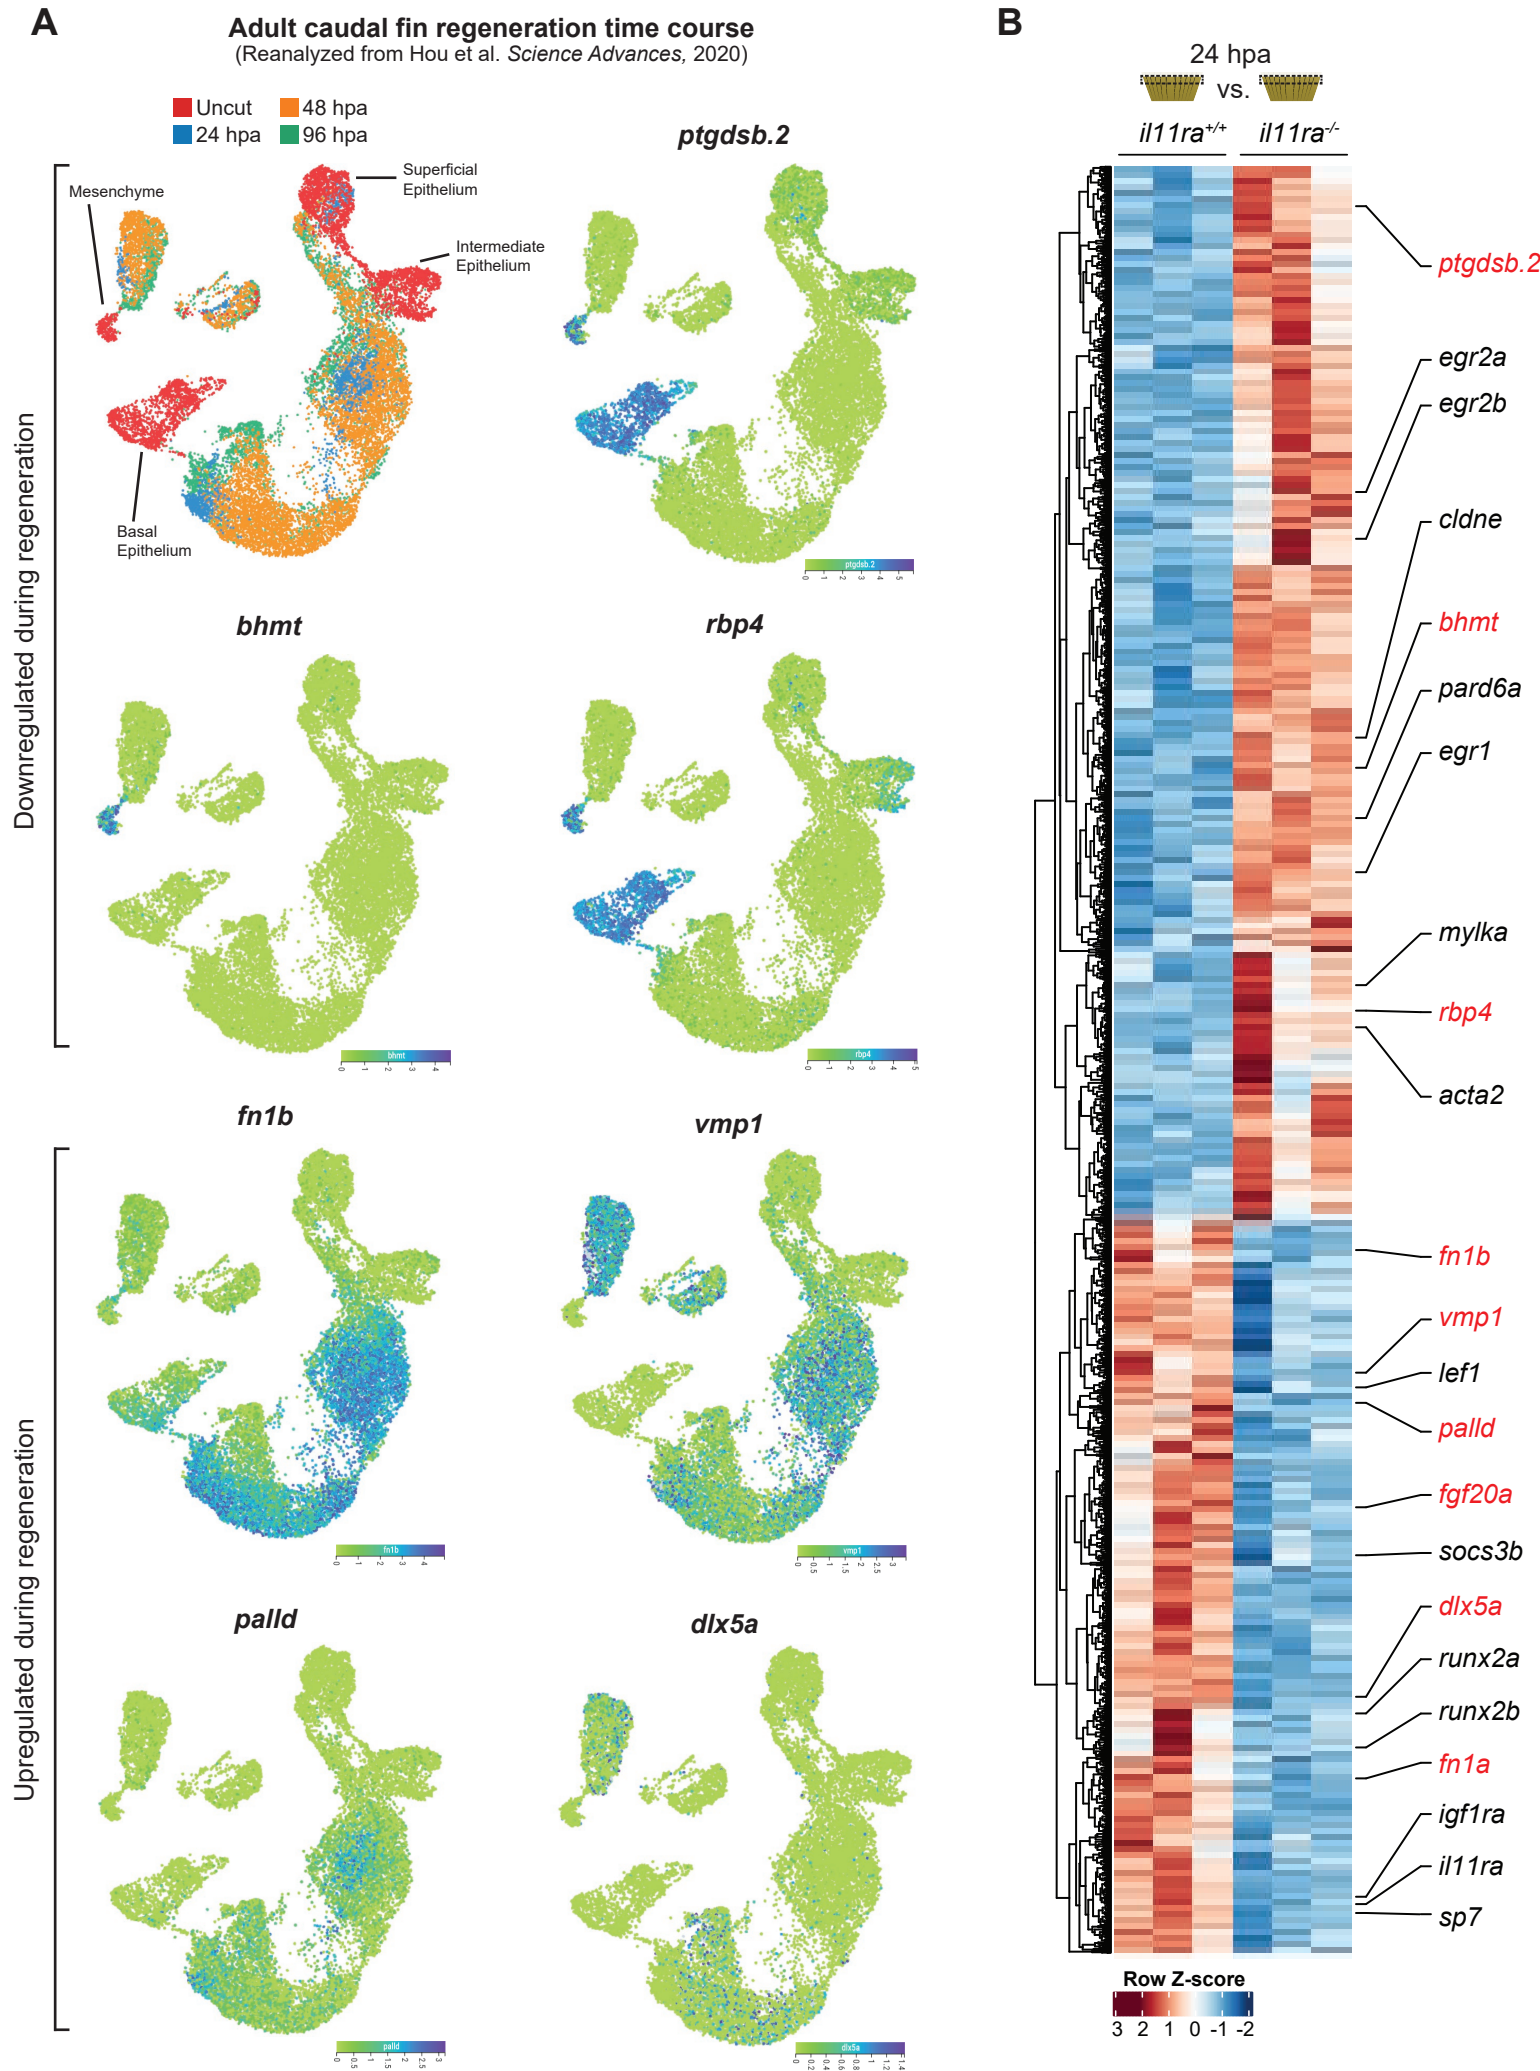

**Figure S6. Il-11 signaling is required for reprogramming of regeneration gene expression in the adult caudal fin after amputation.**

(A) Expression patterns of selected genes from single-cell RNA-seq (reanalyzed from Hou et al., *Sci Adv* 2020) that are specifically upregulated (*fn1b*, *vmp1*, *palld*, *dlx5a*) and downregulated (*rbp4*, *ptgdsb.2*, *bhmt*) during adult caudal fin regeneration that are dysregulated in *ill1ra* mutants at 24 hpa. (B) Differential expression of zebrafish adult caudal fin regeneration genes in *ill1ra*<sup>-/-</sup> vs. wild-type sibling adult caudal fin transcriptomic analysis, 24 hpa.

A

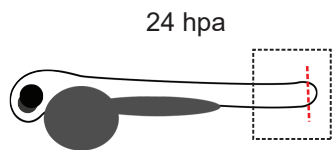

B

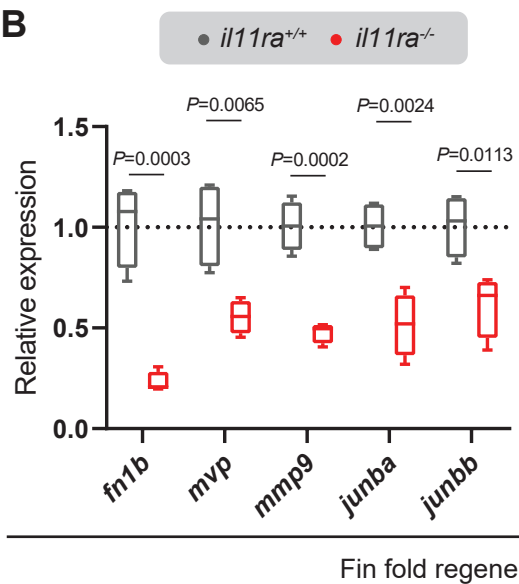

C

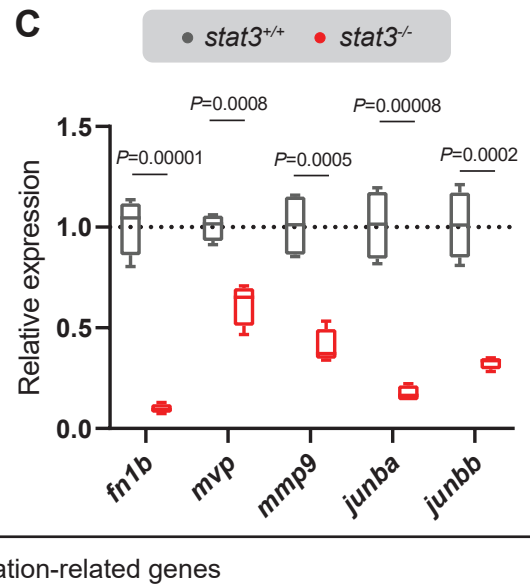

**Figure S7. Comparable deficiency in regeneration gene activation between *ill1ra* and *stat3* mutants during larval fin fold regeneration.**

(A to C) Schematic (A) and RT-qPCR analysis on *ill1ra*<sup>bns251</sup> (B, wt siblings, n=4; mut, n=4; 24 hpa) and *stat*<sup>stl27</sup> (C, wt siblings, n=4; mut, n=4; 24 hpa) for selected fin fold regeneration genes (Yoshinari et al., *Dev Biol* 2009). Box plots (B, C) show median, interquartile range (IQR, box margins) and 5<sup>th</sup> and 95<sup>th</sup> percentiles (whiskers). Student's *t*-tests (B, C). n= pools of 20 larval tails (B, C). Black dashed box demarcates dissected tissue processed for RT-qPCR (A); red dashed line demarcates amputation plane (A). Ct values are listed in table S5.

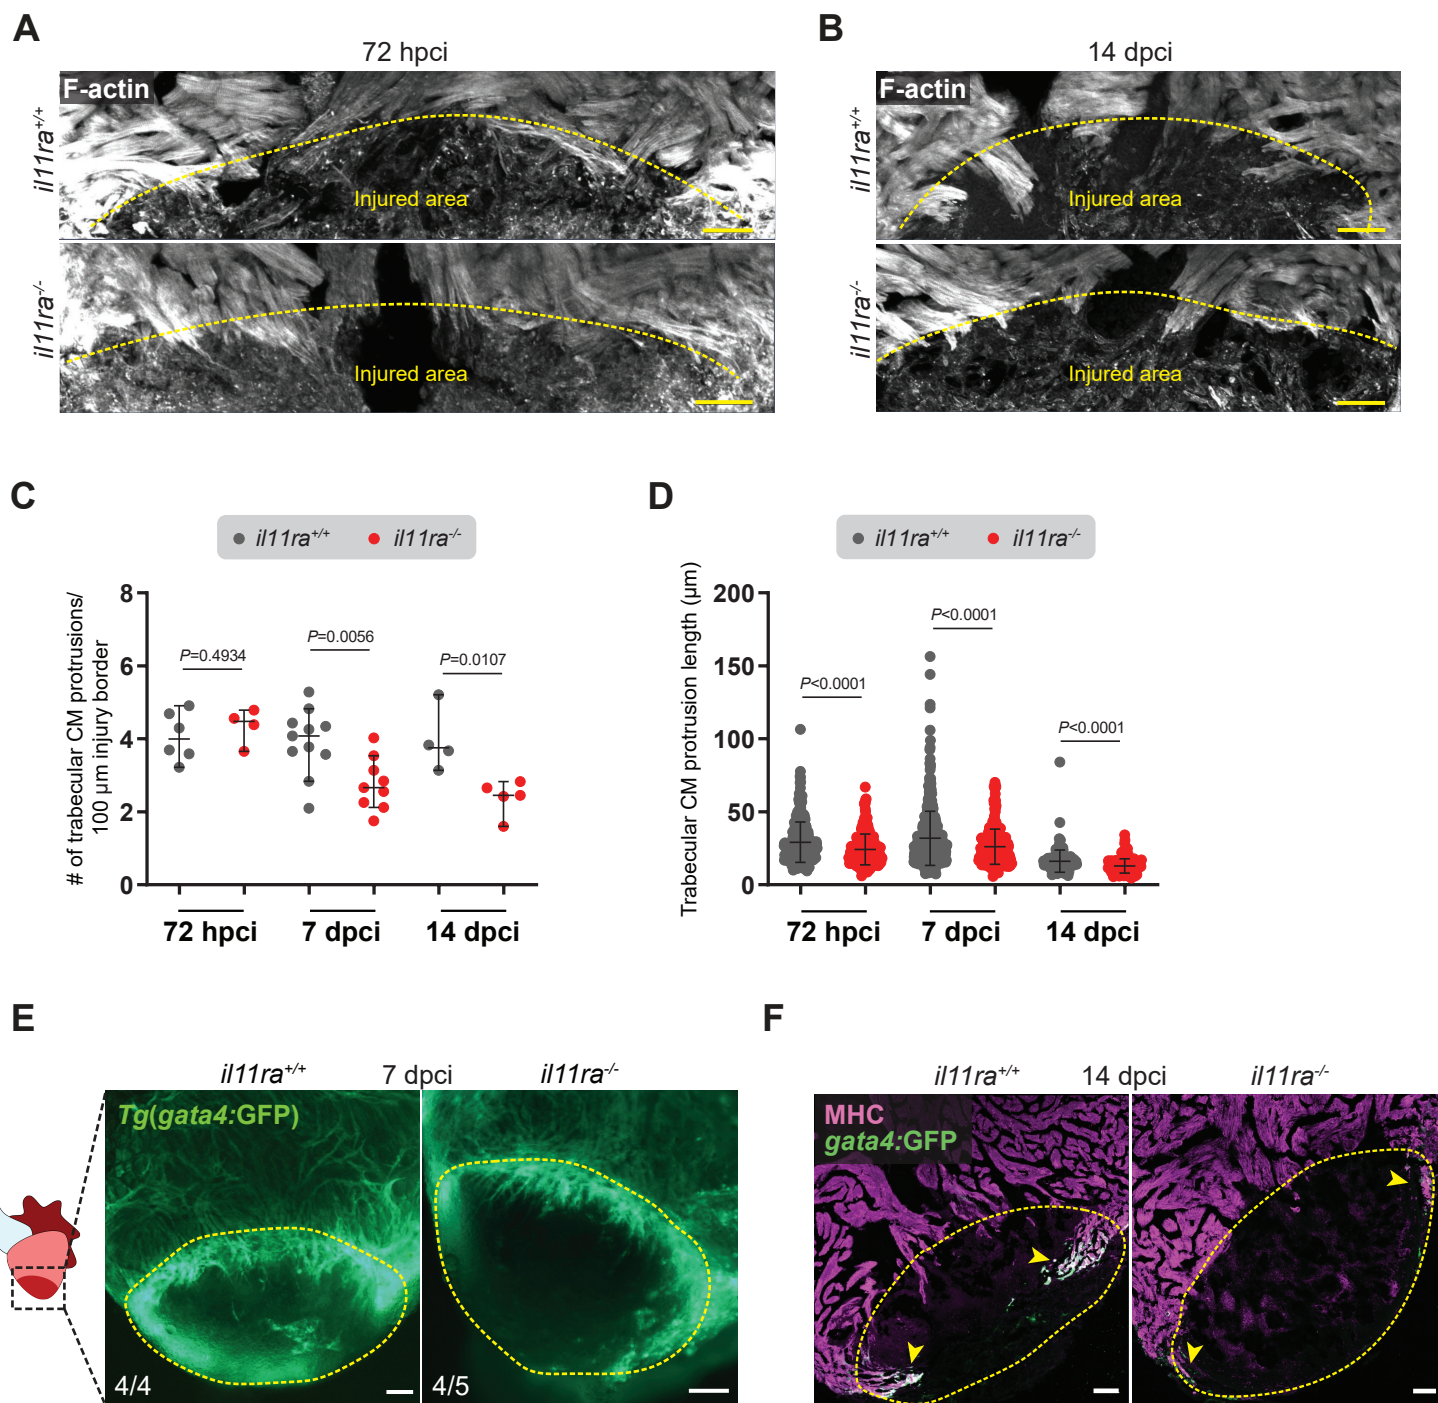



**Figure S8. Defects in cardiomyocyte protrusion in *ill1ra* mutants post cardiac cryoinjury.**

(A to D) F-actin staining on 50  $\mu\text{m}$  thick cryosections from *ill1ra*<sup>-/-</sup> vs. wild-type sibling ventricles, 72 hpci (A), 14 dpci (B), and quantification of the number per ventricle (C, 72 hpci, wt, n=6; mut, n=4; 7 dpci, wt siblings, n=11; mut, n=9; 14 dpci, wt siblings, n=4; mut, n=5), and length (D, 72 hpci, wt, n=357; mut, n=239; 7 dpci, wt, n=540; mut, n=281; 14 dpci, wt, n=148; mut, n=141) of CM protrusions. 7 dpci data in panels C and D are taken from Fig. 4, D and E, respectively, for comparison. (E) Wholemout fluorescence images of *Tg(gata4:EGFP)* expression in ventricles (wt siblings, n=4; mut, n=5; 7 dpci). (F) Immunostaining (GFP – green, MHC – magenta) on cryosections from *Tg(gata4:GFP)* ventricles (wt siblings, n=4; mut, n=5; 14 dpci), corresponding to Fig. 4, F and G. Data represent mean  $\pm$  S.D. (C) and mean  $\pm$  S.E.M. (D). Student's *t*-tests (C); Mann-Whitney *U* tests (D). n= ventricles (C); n= CM protrusions (D). Yellow dashed lines demarcate the injured area (A, B, E, F); arrowheads point to protruding *Tg(gata4:GFP)*<sup>+</sup> MHC<sup>+</sup> cortical CMs (F). Scale bars, 50  $\mu\text{m}$  (A, B, F), 100  $\mu\text{m}$  (E).

**A**

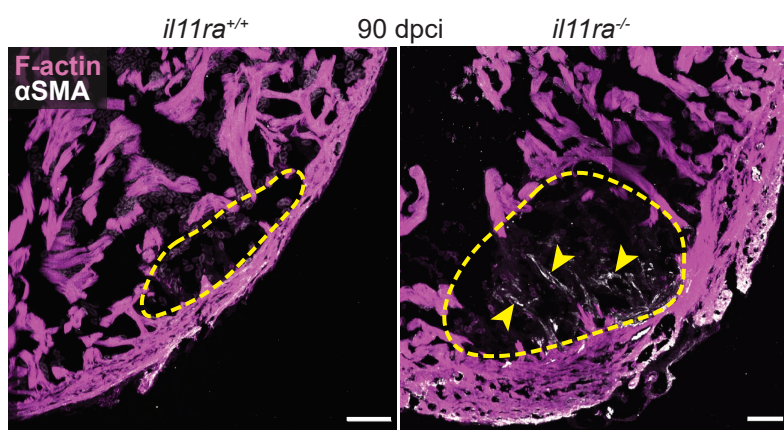

**B**

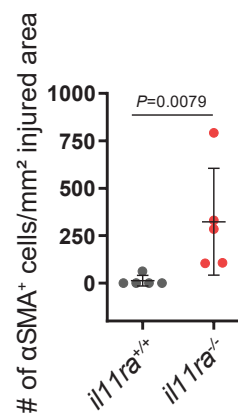

**C**

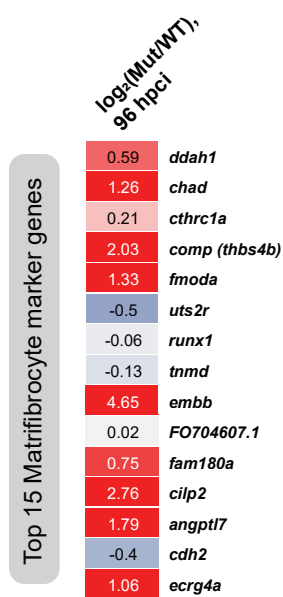

**D**

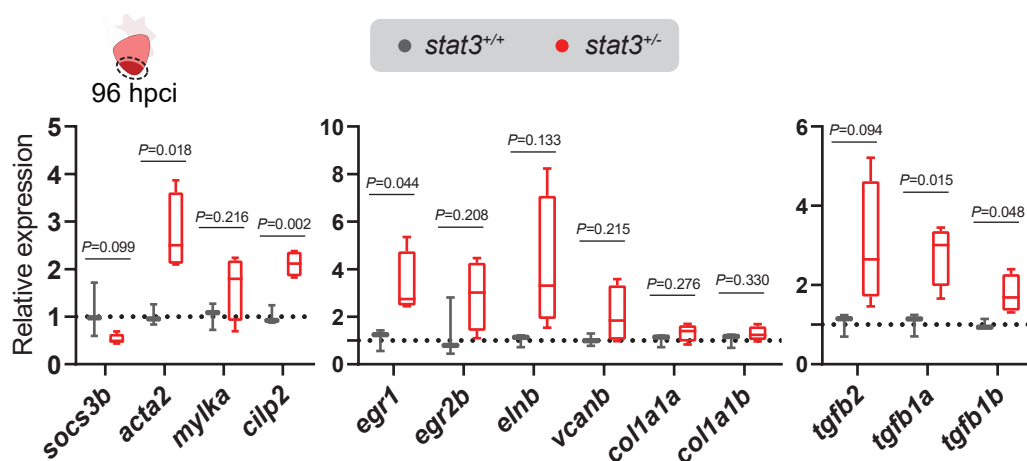

**E**

Epithelial-to-mesenchymal transition

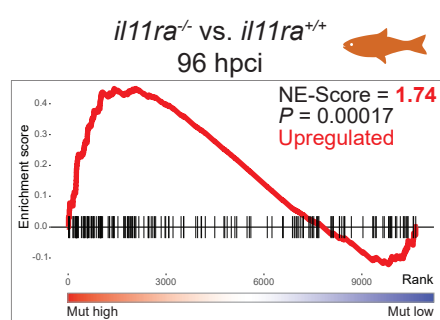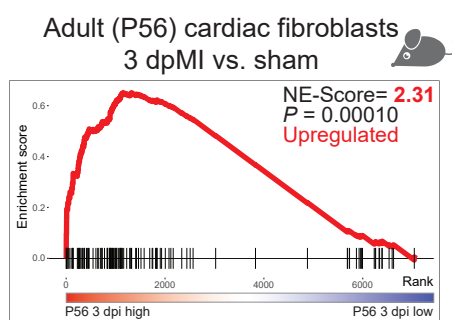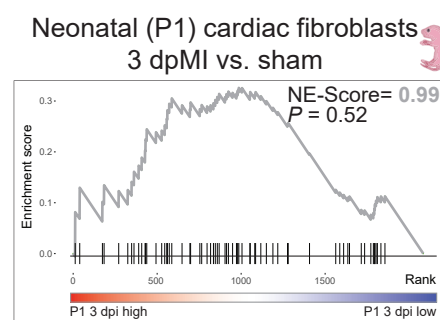

**F**

Collagen biosynthesis and modifying enzymes

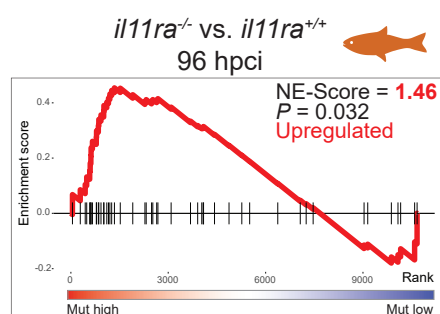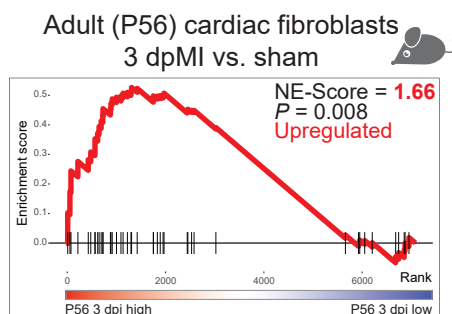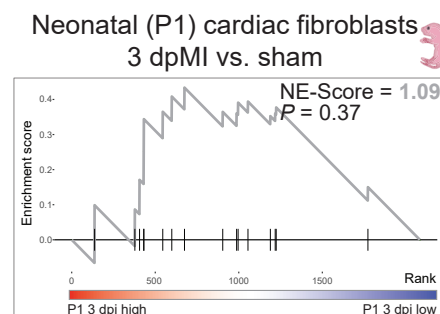

**Figure S9. Similarities between non-regenerative *ill1ra* mutants and adult mammalian cardiac fibrosis after cardiac injury.**

(A and B) Immunostaining ( $\alpha$ SMA – white) and F-actin (magenta) staining on cryosections from ventricles (A, wt siblings, n=5; mut, n=5; 90 dpci) and quantification of  $\alpha$ SMA<sup>+</sup> cells in the scar tissue (B). (C) Expression of top 15 matrifibrocyte genes (reanalyzed from Fu et al., *J Clin Invest* 2018) in *ill1ra*<sup>-/-</sup> vs. wild-type sibling ventricle transcriptomic profiles, 96 hpci. (D) RT-qPCR analysis on dissected injured areas of heterozygous *stat3*<sup>sl27</sup> (n=4) vs. wild-type sibling (n=3) ventricles for selected fibrosis-associated genes, 96 hpci. (E and F) GSE analysis plots comparing fibrosis-associated ontology terms between *ill1ra*<sup>-/-</sup> vs. wild-type sibling ventricle transcriptomic profiles (96 hpci) and myocardial infarction (MI) vs. sham from adult (P56) and neonatal (P1) cardiac fibroblast transcriptomic profiles, 3 days post MI (dpMI) (reanalyzed from Quaife-Ryan et al., *Circulation* 2017). Data represent mean  $\pm$  S.D. (B) and box plots (D) show median, interquartile range (IQR, box margins) and 5<sup>th</sup> and 95<sup>th</sup> percentiles (whiskers). Student's *t*-tests (D); Mann-Whitney *U* test (B). n= ventricles (A, D). Yellow dashed lines demarcate the injured area (A); arrowheads point at  $\alpha$ SMA<sup>+</sup> cells in the injured area (A). Ct values are listed in table S5. Scale bars, 50  $\mu$ m (A).

A

**Uninjured adult zebrafish heart**  
(Reanalyzed from Spanjaard et al. *Nat Biotech*, 2018)

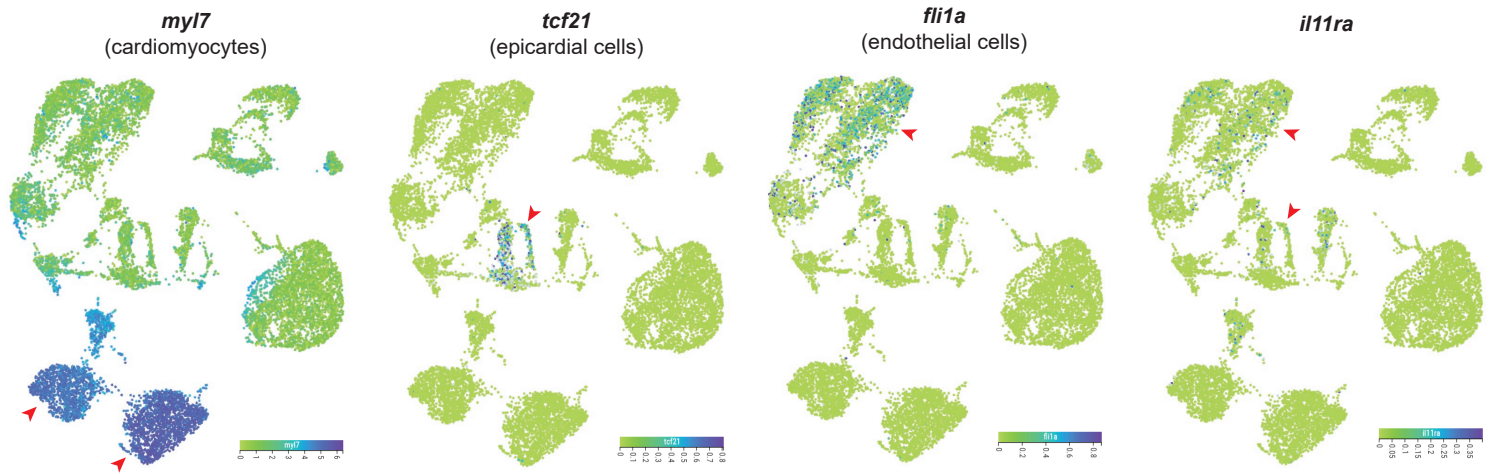

B

**Adult caudal fin regeneration time course**  
(Reanalyzed from Hou et al. *Science Advances*, 2020)

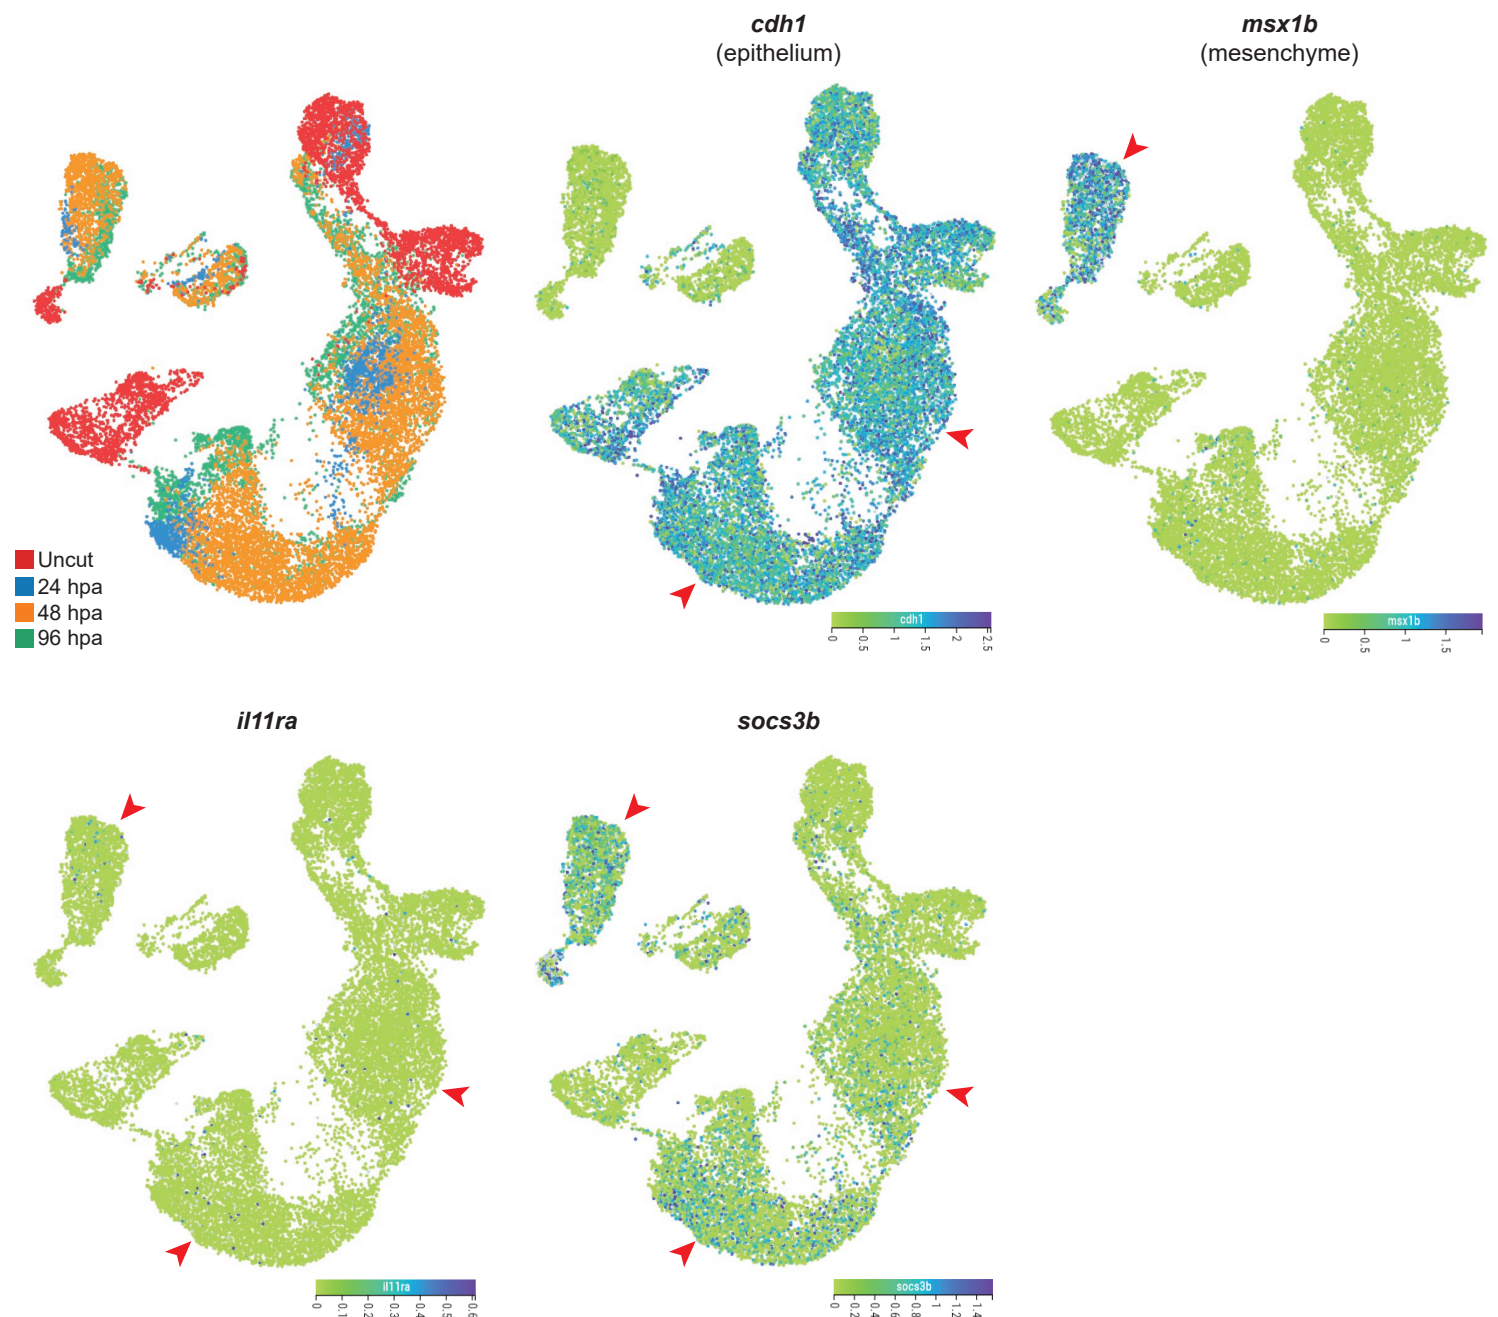

**Figure S10. IL-11/Stat3 pathway gene expression patterns at the single-cell level in the uninjured heart and during caudal fin regeneration in adult zebrafish.**

(A) Expression patterns of selected cell population marker genes and *ill1ra* in single-cell RNA-seq data from uninjured adult zebrafish hearts (reanalyzed from Spanjaard et al., *Nat Biotech* 2018). (B) Expression patterns of selected cell population marker genes, *ill1ra*, and *socs3b* in single-cell RNA-seq data from regenerating adult zebrafish caudal fins (reanalyzed from Hou et al., *Sci Adv* 2020). Red arrowheads point to respective cell clusters (A, B).

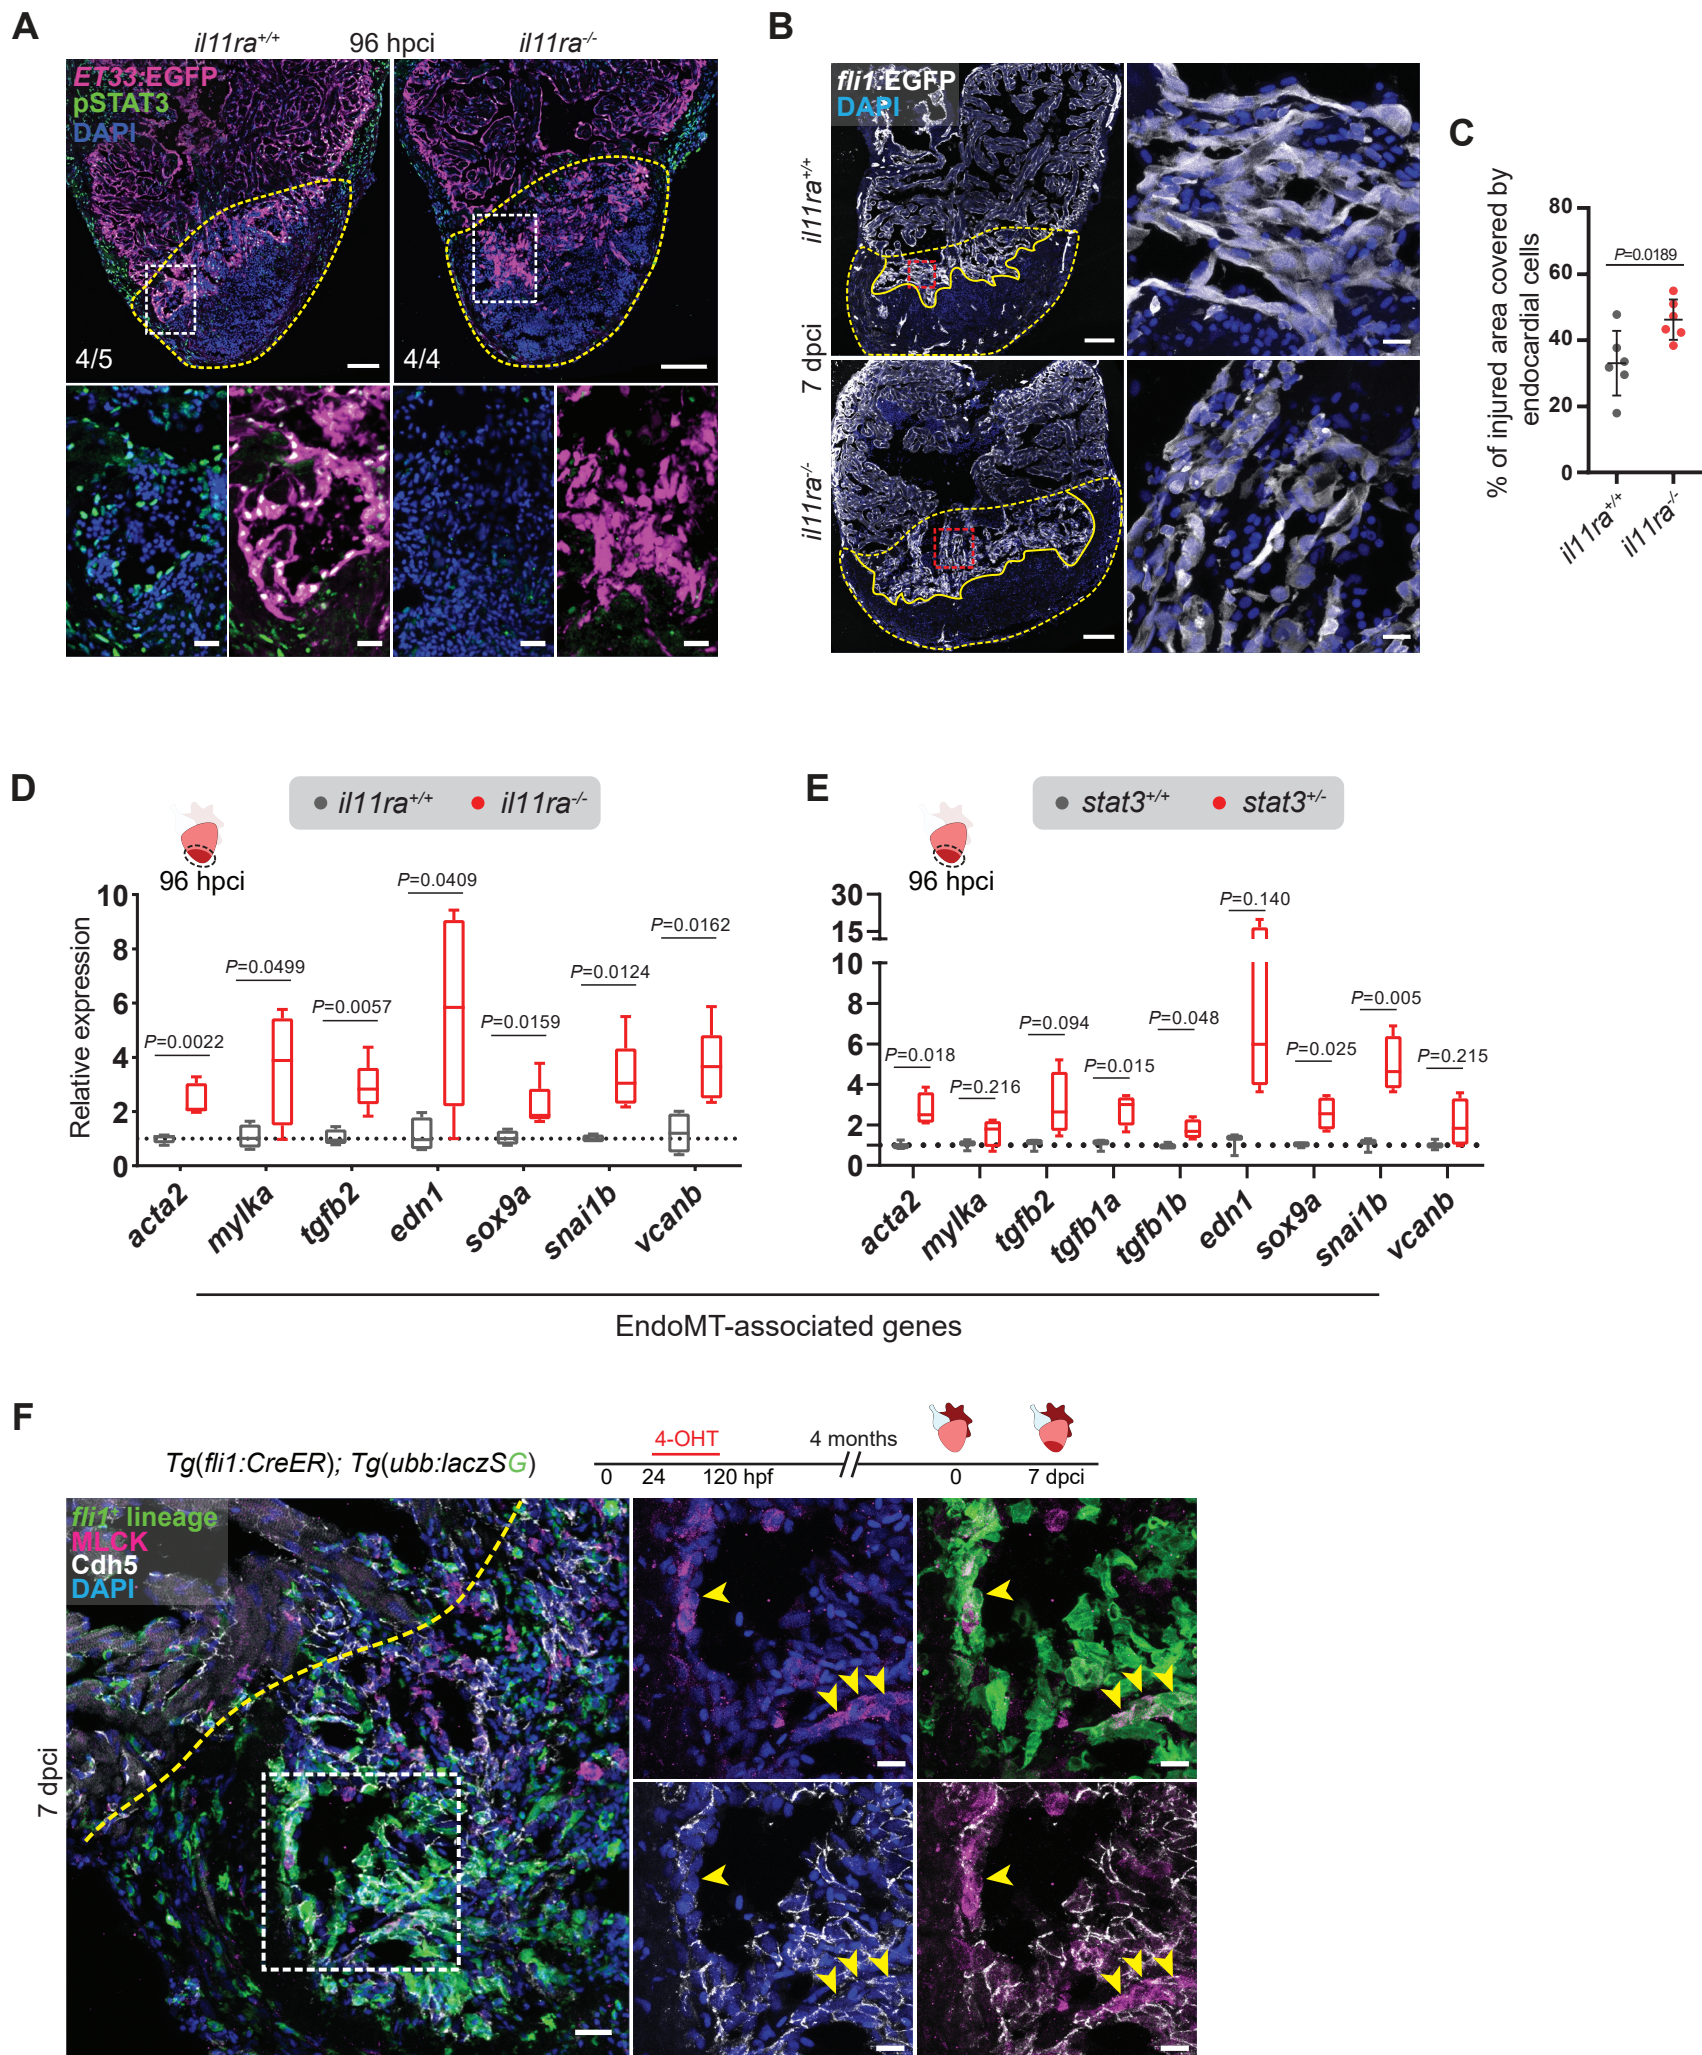

**Figure S11. Canonical Il-11/Stat3 signaling antagonizes endothelial-to-mesenchymal transition.**

(A) Immunostaining (GFP – magenta, pStat3 Y705 – green) on cryosections from *Tg(ET33:GFP) ill1ra<sup>-/-</sup>* (n=4) vs. wild-type (n=5) siblings, 96 hpci. (B) Immunostaining (GFP – white) on ventricle cryosections from *Tg(fli1:EGFP) ill1ra<sup>-/-</sup>* vs. wild-type siblings, 7 dpci. (C) Quantification of percentage of injured area covered by *Tg(fli1:EGFP)<sup>+</sup>* endocardial cells (wt siblings, n=6; mut, n=6) from 50  $\mu$ m thick ventricle cryosections, 7 dpci. (D and E) RT-qPCR analysis on dissected injured areas of mutant *ill1ra<sup>bns251</sup>* (D, n=5) or heterozygous *stat3<sup>stl27</sup>* (E, n=4) vs. wild-type siblings (n=4 and 3, respectively) ventricles, 96 hpci, for EndoMT-associated gene expression levels. *acta2*, *mylka*, *tgfb2* and *vcanb* mRNA levels in panel D are taken from Fig. 5E for comparison. (F) Experimental design and confocal images of immunostaining (GFP – green, Cdh5 – white, and Myosin light chain kinase, MLCK – magenta) on cryosections from *Tg(fli1:CreER); Tg(ubb:lacZSG) ill1ra<sup>-/-</sup>* ventricle, 7 dpci. Data represent mean  $\pm$  S.D. (C) and box plots (D, E) show median, interquartile range (IQR, box margins) and 5<sup>th</sup> and 95<sup>th</sup> percentiles (whiskers). Student's *t*-tests (C, D, E). n= ventricles (A, C, D, E). Yellow dashed lines demarcate the injured area (A, B, F); yellow lines demarcate endocardial invasion in the injured area (B); yellow arrowheads point to *fli1<sup>+</sup>* derived MLCK<sup>+</sup> cells (F). Ct values are listed in table S5. Scale bars, 100  $\mu$ m (A, B), 20  $\mu$ m (A insets, F), 10  $\mu$ m (B insets, F insets).

**A**

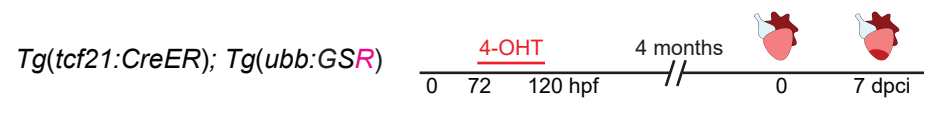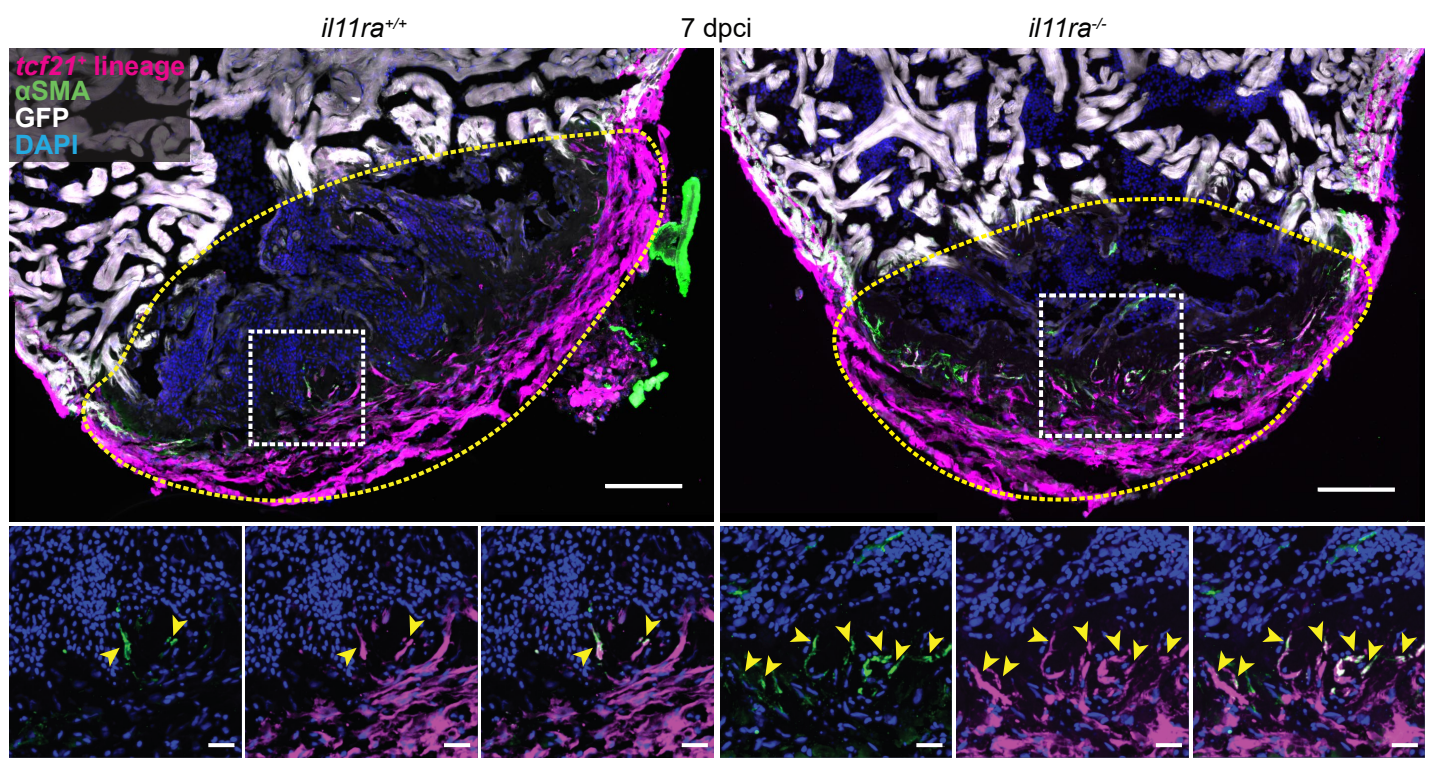

**B**

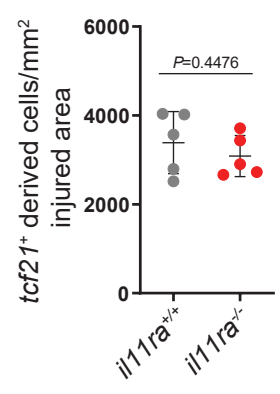

**C**

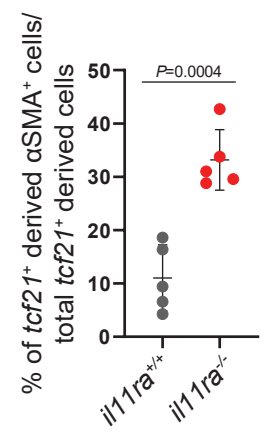



**Figure S12. Il-11 signaling limits epicardial-derived myofibroblast differentiation after cardiac cryoinjury.**

(A) Experimental design and confocal images of immunostaining (mCherry – magenta,  $\alpha$ SMA – green) on cryosections from *Tg(tcf21:CreER); Tg(ubb:GSR)* ventricles (wt siblings, n=5; mut, n=5; 7 dpci). (B and C) Quantification of density of *tcf21*<sup>+</sup> derived cells in the injured area (B) and percentage of *tcf21*<sup>+</sup> derived  $\alpha$ SMA<sup>+</sup> cells in the injured area (C). Data represent mean  $\pm$  S.D. (B, C). Student's *t*-tests (B, C). n= ventricles (A). Yellow dashed lines demarcate the injured area (A); yellow arrowheads point to *tcf21*<sup>+</sup> derived  $\alpha$ SMA<sup>+</sup> cells (A insets). Scale bars, 100  $\mu$ m (A), 20  $\mu$ m (A insets).

**A**

*Tg(fli1:CreER);*  
*Tg(hsp70l:LBL-il11ra-p2a-mCh)*

4-OHT 8 months 4-OHT 1 hr 37°C

0 48 120 hpf // -4 -3 -2 0 1 2 3 4 5 6 7 dpci

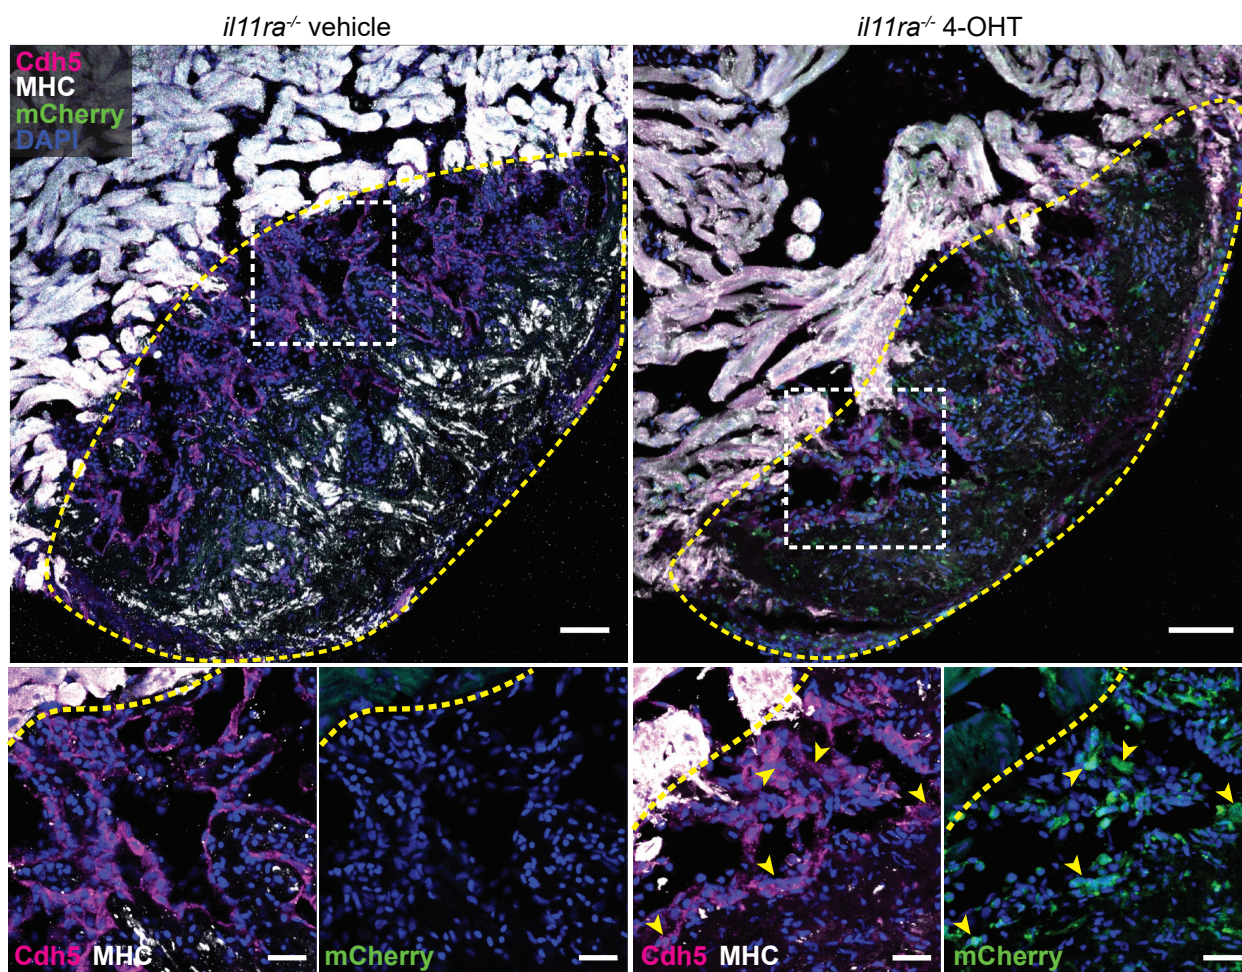

**B**

*Tg(fli1:CreER);*  
*Tg(hsp70l:LBL-il11ra-p2a-mCh)*

4-OHT 8 months 4-OHT 1 hr 37°C

0 48 120 hpf // -4 -3 -2 0 1 2 3 4 5 6 7 dpci

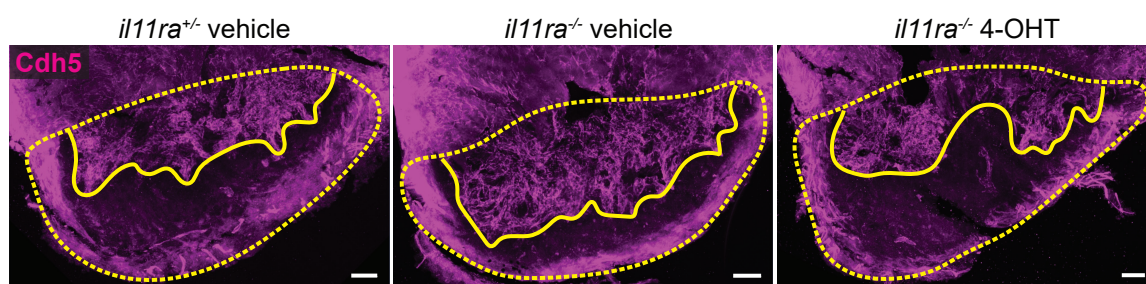

**C**

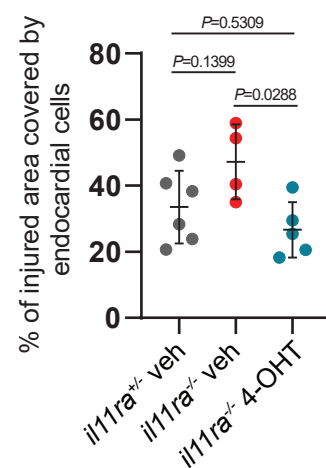

**Figure S13. IL-11 signaling in endothelial cells regulates endocardial cell invasion of the injured area after cardiac cryoinjury.**

(A) Experimental design and confocal images of immunostaining (Cdh5 – magenta, MHC – white, and mCherry – green) on cryosections from vehicle or 4-OHT treated *ill1ra*<sup>-/-</sup> *Tg(fli1:CreER); Tg(hsp70l:LBL-ill1ra-p2a-mCh)* sibling ventricles at 7 dpci. (B) Experimental design and confocal images of immunostaining for Cdh5 expression on 50 μm thick cryosections from vehicle treated *ill1ra*<sup>+/-</sup> siblings, and vehicle or 4-OHT treated *ill1ra*<sup>-/-</sup> *Tg(fli1:CreER); Tg(hsp70l:LBL-ill1ra-p2a-mCh)* ventricles at 7 dpci. (C) Quantification of percentage of the injured area covered by Cdh5<sup>+</sup> endocardial cells (*ill1ra*<sup>+/-</sup> veh, n=6; *ill1ra*<sup>-/-</sup> veh, n=4; *ill1ra*<sup>-/-</sup> 4-OHT, n=5; 7 dpci). Data represent mean ± S.D. (C). One-way ANOVA (C). n= ventricles (C). Yellow dashed lines demarcate the injured area (A, B); yellow lines demarcate the endocardial invasion in the injured area (B). Scale bars, 50 μm (A, B), 20 μm (A insets).

**Supplementary Tables**

**Table S1.** Moderate physical exercise vs. cardiac cryoinjury - co-regulated genes in zebrafish ventricles.

**Table S2.** Canonical pathway and upstream regulator prediction analyses on moderate physical exercise vs. cardiac cryoinjury co-regulated genes.

**Table S3.** Evolutionarily conserved adult caudal fin regeneration gene expression in *ill1ra* mutants vs. wild types at 24 hpa.

**Table S4.** Gene set enrichment analyses on *ill1ra* mutant vs. wild-type ventricles, adult and neonatal mouse cardiac fibroblasts post cardiac injury.

**Table S5.** Primer sequences and Ct values.

**Table S6.** Proteins used for phylogenetic analysis.

**IL-6 family receptors:**

| Protein | Encoding transcript ID | Length |
|---------|------------------------|--------|
| hCNTFR  | ENST00000351266.8      | 372 aa |
| hIL6R   | ENST00000368485.8      | 486 aa |

|          |                       |         |
|----------|-----------------------|---------|
| hIL11RA  | ENST00000441545.7     | 422 aa  |
| hLIFR    | ENST00000263409.8     | 1097 aa |
| hOSMR    | ENST00000274276.8     | 979 aa  |
| zll1ra   | ENSDART00000030976.7  | 402 aa  |
| mIL11RA1 | ENSMUST00000098132.10 | 432 aa  |
| mIL11RA2 | ENSMUST00000179253.1  | 432 aa  |

**IL-6 family cytokines:**

| Protein | Encoding transcript ID | Length |
|---------|------------------------|--------|
| hCNTF   | ENST00000361987.6      | 200 aa |
| hIL6    | ENST00000404625.5      | 212 aa |
| hIL11   | ENST00000264563.7      | 199 aa |
| hLIF    | ENST00000249075.4      | 202 aa |
| hOSM    | ENST00000215781.3      | 252 aa |
| zll1a   | XM 693882.9            | 219 aa |
| zll1b   | ENSDART00000081440.4   | 192 aa |
| mIL11   | ENSMUST00000094892.11  | 199 aa |
